# Essential New Textbooks in Psychiatry!

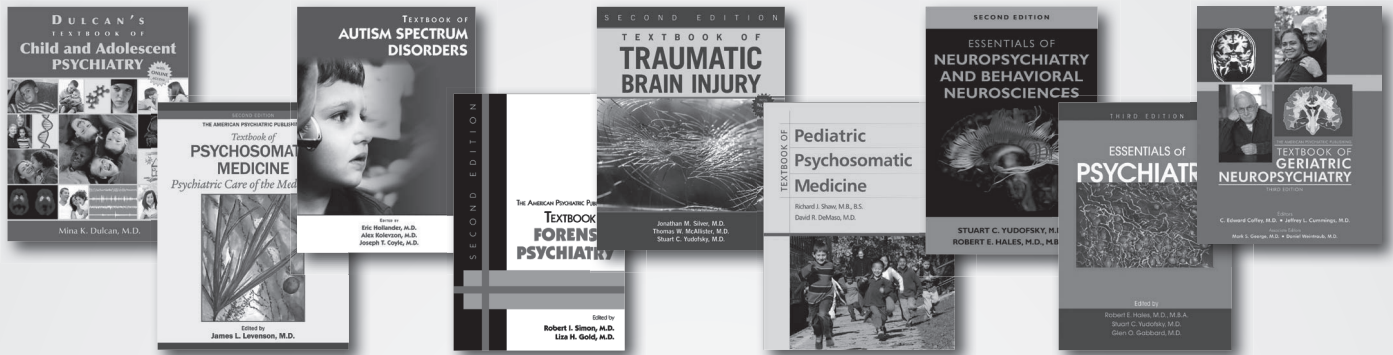

## Dulcan's Textbook of Child and Adolescent Psychiatry

**NEW!**

Edited by Mina K. Dulcan, M.D.

2010 • 1,104 pages • ISBN 978-1-58562-323-5  
Hardcover • \$239.00 • Item #62323

## The American Psychiatric Publishing Textbook of Psychosomatic Medicine Psychiatric Care of the Medically Ill, Second Edition

**NEW!**

Edited by James L. Levenson, M.D.

2011 • 1,248 pages • ISBN 978-1-58562-379-2  
Hardcover • \$219.00 • Item #62379

## Textbook of Autism Spectrum Disorders

**NEW!**

Edited by Eric Hollander, M.D., Alexander Kolevzon, M.D., and Joseph T. Coyle, M.D.  
Foreword by Sally J. Rogers, Ph.D.

2011 • 656 pages • ISBN 978-1-58562-341-9  
Paperback • \$89.00 • Item #62341

## The American Psychiatric Publishing Textbook of Forensic Psychiatry, Second Edition

**NEW!**

Edited by Robert I. Simon, M.D., and Liza H. Gold, M.D.

2010 • 726 pages • ISBN 978-1-58562-378-5  
Hardcover • \$120.00 • Item #62378

## Textbook of Traumatic Brain Injury, Second Edition

**Coming February 2011**

Edited by Jonathan M. Silver, M.D., Thomas W. McAllister, M.D., and Stuart C. Yudofsky, M.D.

2011 • 704 pages • ISBN 978-1-58562-357-0  
Hardcover • \$175.00 • Item #62357

## Textbook of Pediatric Psychosomatic Medicine

**NEW!**

Edited by Richard J. Shaw, M.B., B.S., and David R. DeMaso, M.D.

2010 • 551 pages • ISBN 978-1-58562-350-1  
Hardcover • \$125.00 • Item #62350

## Essentials of Neuropsychiatry and Behavioral Neurosciences, Second Edition

**NEW!**

Edited by Stuart C. Yudofsky, M.D., and Robert E. Hales, M.D., M.B.A.

2010 • 629 pages • ISBN 978-1-58562-376-1  
Paperback • \$129.00 • Item #62376

## Essentials of Psychiatry, Third Edition

**NEW!**

Edited by Robert E. Hales, M.D., M.B.A., Stuart C. Yudofsky, M.D., and Glen O. Gabbard, M.D.

2011 • 806 pages • ISBN 978-1-58562-933-6  
Paperback • \$134.00 • Item #62933

## The American Psychiatric Publishing Textbook of Geriatric Neuropsychiatry, Third Edition

**Coming February 2011**

Edited by C. Edward Coffey, M.D., and Jeffrey L. Cummings, M.D.

Associate Editors: Mark S. George, M.D., and Daniel Weintraub, M.D.

2011 • pages TBD • ISBN 978-1-58562-371-6  
Hardcover • \$219.00 • Item #62371

New 20% Discount For American Psychiatric Association Members!

25% Discount For APA Members-in-Training

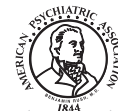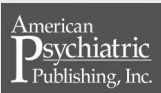

The First and Last Word in Psychiatry

Order Online: [www.appi.org](http://www.appi.org) • Phone: 1-800-368-5777 • Fax: 703-907-1091 • Email: [appi@psych.org](mailto:appi@psych.org)

Priority Code AH1047

Find us on Facebook and Twitter.
