# New and Bestselling Titles in Psychopharmacology

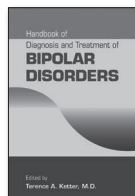

## Handbook of Diagnosis and Treatment of Bipolar Disorders

Edited by Terence A. Ketter, M.D.

This readable guide to the assessment and management of patients with bipolar disorder can help physicians keep abreast of dramatic and rapid advances of recent years and integrate them into their practice. The contributions of the eleven chapter authors from Stanford University reflect more than a decade of clinical research and treatment undertaken at that institution, including advances in diagnosis and interventions supported by controlled studies. They provide crucial information regarding diagnosis, pharmacotherapy, psychotherapy, and treatment of patients from special populations—such as children, women, and older adults—and patients with particular challenging illness course such as rapid cycling.

*Clinical Manual of Bipolar Disorder* is the ideal source for integrating recent research into everyday practice.

2010 • 768 pages • ISBN 978-1-58562-313-6 • Paperback • \$72.00 • Item #62313

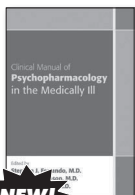

## Clinical Manual of Psychopharmacology in the Medically Ill

Edited by Stephen J. Ferrando, M.D., James L. Levenson, M.D., and James A. Owen, Ph.D.

Psychiatric drugs are frequently used in the medically ill and are prescribed to nearly three-quarters of medically ill patients seen in psychiatric consultation. Primary care and other nonpsychiatric physicians account for more than one-half of prescriptions written for psychiatric drugs, typically to patients with complex medical illnesses. Appropriate use of psychopharmacology in the medically ill requires careful consideration of the underlying disease process and the potential for multiple complex interactions. *Clinical Manual of Psychopharmacology in the Medically Ill* is a comprehensive yet practical guide to psychotropic prescribing for patients who are medically ill.

2010 • 640 pages • ISBN 978-1-58562-367-9 • Paperback • \$75.00 • Item #62367

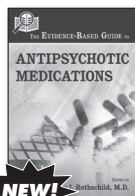

## The Evidence-Based Guide to Antipsychotic Medications

Edited by Anthony J. Rothschild, M.D.

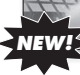

The first in a new series, this book is a comprehensive overview of our current knowledge regarding the use of antipsychotic medications to treat a broad range of psychiatric conditions.

Central to the volume's clinical utility are two standout features: Key Clinical Points and the Appendixes. The former are located at the end of each chapter and consist of the most critical knowledge to be gleaned from that section. The latter represent a storehouse of useful information, including drug tables (names, strengths, formulations, pharmacokinetics, and dosing); advice on initiating and monitoring antipsychotic medications; common side effects and their management; and special considerations for use during pregnancy and breastfeeding. *The Evidence-Based Guide to Antipsychotic Medications* is a comprehensive guide for busy clinicians and advanced students that is rigorous, yet reader-friendly.

2010 • 391 pages • ISBN 978-1-58562-366-2 • Paperback • \$59.00 • Item #62366

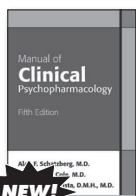

## Manual of Clinical Psychopharmacology, Seventh Edition

Alan F. Schatzberg, M.D., Jonathan O. Cole, M.D., and Charles DeBattista, D.M.H., M.D.

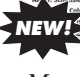

Since publication of the first edition of the *Manual of Clinical Psychopharmacology* in 1986, the number of psychotropic medications has expanded greatly, and these medications are being used in unforeseen and unprecedented ways. Pharmaceutical companies develop—and clinicians and patients await—new drug therapies to treat diverse conditions, from attention-deficit/hyperactivity disorder to social phobia, from posttraumatic stress disorder to depression. The pace and complexity of research in this critical discipline make it essential that practitioners stay abreast of both new medications and promising treatment protocols.

2010 • 744 pages • ISBN 978-1-58562-377-8 • Paperback • \$92.00 • Item #62377

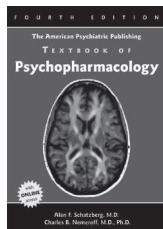

## The American Psychiatric Publishing Textbook of Psychopharmacology, Fourth Edition

Edited by Alan F. Schatzberg, M.D., and Charles B. Nemeroff, M.D., Ph.D.

Covering both basic science and clinical practice, this new edition draws on the talents of 53 new contributors to guarantee fresh, authoritative perspectives on advances in psychiatric drug therapy.

Introductory chapters provide a theoretical grounding in clinical applications, with coverage ranging from neurotransmitters to clinical trial design. The “Classes of Psychiatric Treatment” section is a virtual pharmacopoeia, with chapters devoted to specific agents. Chapters in the “Clinical Psychobiology and Psychiatric Syndromes”

section review the neurological underpinnings of specific disorders, providing a context for understanding psychopharmacological approaches to treatment.

2009 • 1648 pages • ISBN 978-1-58562-309-9  
Hardcover • \$285.00 • Item #62309

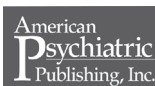

The First and Last Word in Psychiatry [www.appi.org](http://www.appi.org) • 1-800-368-5777

**New 20% Discount for American Psychiatric Association Members**

**25% Discount for APA Members-in-Training** • Please use priority code AH1053 when ordering.
