# FOCUS

THE JOURNAL OF LIFELONG LEARNING IN PSYCHIATRY



## *Psychopharmacology: Treatment-Resistant Disorders*

*Guest Editor, Charles B. Nemeroff, M.D., Ph.D.*

### IN CLINICAL SYNTHESIS:

Advances in the Management of  
Treatment-Resistant Schizophrenia

*Jacob S. Ballon, M.D.  
Jeffrey A. Lieberman, M.D.*

Advances in the Management of  
Treatment-Resistant Depression

*Paul E. Holtzheimer, M.D.*

Advances in the Management of  
Treatment-Resistant Anxiety Disorders

*Nicole M. Lanouette, M.D.  
Murray B. Stein, M.D., M.P.H.*

New Vistas in the Management of  
Treatment-Refractory Psychiatric Disorders:  
Genomics and Personalized Medicine

*Amanda J. Myers, Ph.D.  
Charles B. Nemeroff, M.D., Ph.D.*

AND INFLUENTIAL PUBLICATIONS . . .
